# Supplementary material for: Lychee Seed Fraction Inhibits Aβ(1-42)-Induced Neuroinflammation in BV-2 Cells via NF-κB Signaling Pathway
Source: PubMed Central journal article supplement (PMC5925968; doi:10.3389/fphar.2018.00380), 2018-04-23
Supplement: Image_1.pdf [file Image_1.pdf]

## Supplementary Material

### Lychee Seed Fraction Inhibits A $\beta$ (1–42)-Induced Neuroinflammation in BV-2 Cells via NF- $\kappa$ B Signaling Pathway

Ya Zhao<sup>1†</sup>, Yuan Zeng<sup>1,2†</sup>, Anguo Wu<sup>1†</sup>, Chonglin Yu<sup>3</sup>, Yong Tang<sup>1</sup>, Xiuling Wang<sup>1</sup>, Rui Xiong<sup>1</sup>, Haixia Chen<sup>1</sup>, Jianming Wu<sup>1\*</sup>, and Dalian Qin<sup>1\*</sup>

<sup>1</sup> Laboratory of Chinese Materia Medica, Department of Pharmacology, School of Pharmacy, Southwest Medical University, Luzhou, Sichuan, China

<sup>2</sup> Department of pharmacy, Affiliated Hospital of Southwest Medical University, Luzhou, China,

<sup>3</sup> Department of Human Anatomy, School of Preclinical Medicine, Southwest Medical University, Luzhou, Sichuan, China

#### \* Correspondence:

Prof. Jianming Wu  
jianmingwu@swmu.edu.cn

Prof. Dalian Qin  
dalianqin@swmu.edu.cn

#### Supplementary Figures and Tables

**Supplementary Figure 1.** Identification of the chemical components in LSF using Agilent 6230 UHPLC-DAD-TOF-MS. LSF in methanol was separated on an Agilent Zorbax Eclipse Plus C-18 (100 mm  $\times$  2.1 mm) column (particle size: 1.8  $\mu$ m) at a flow rate of 0.35 mL min<sup>-1</sup>. The data was acquired in the scan mode from m/z 100–1700 Da with 2.0 spectra/s. (A) The total ion chromatogram (TIC) of LSF in negative mode. (B) The total ion chromatogram (TIC) of LSF in positive mode. (C) DAD chromatogram recorded at 280 nm.

**Supplementary Figure 2.** Release of the pro-inflammatory cytokines in A $\beta$ (1-42)-induced BV-2 cells. ELISA was used to determine the levels of IL-1 $\beta$  (A), COX-2 (B) and iNOS (C) in the cell-free supernatants. \* $P$  < 0.05, \*\* $P$  < 0.01, \*\*\* $P$  < 0.001 vs. Control.

**Supplementary Figure 3.** Inhibition effect of LSF on the release of the pro-inflammatory cytokines in A $\beta$ (1-42)-induced BV-2 cells. BV-2 cells were pretreated with 5  $\mu$ M A $\beta$ (1-42) for 12 h, then followed with an incubation of 0.007–0.48 mg L<sup>-1</sup> LSF for another 12 h. ELISA was used to determine the levels of IL-1 $\beta$  (A), COX-2 (B) and iNOS (C) in the cell-free supernatants. \*\* $P$  < 0.01 vs. Control; # $P$  < 0.05, ## $P$  < 0.01, ### $P$  < 0.01 vs. Model.

**Supplementary Figure 4.** Inhibition effect of LSF on the inflammatory cytokines in A $\beta$ (1-42)-induced BV-2 cells. BV-2 cells were pretreated with 5  $\mu$ M A $\beta$ (1-42) for 24 h, then followed with an incubation

of 0.007-0.48 mg L<sup>-1</sup> LSF for another 24 h. ELISA was used to determine the levels of IL-1 $\beta$  (A), COX-2 (B) and iNOS (C) in the cell-free supernatants. \**P* < 0.05, \*\**P* < 0.01 vs. Control; #*P* < 0.05 vs. Model.

**Supplementary Figure 5.** The full-length Western blotting images.

Supplementary Figure 1

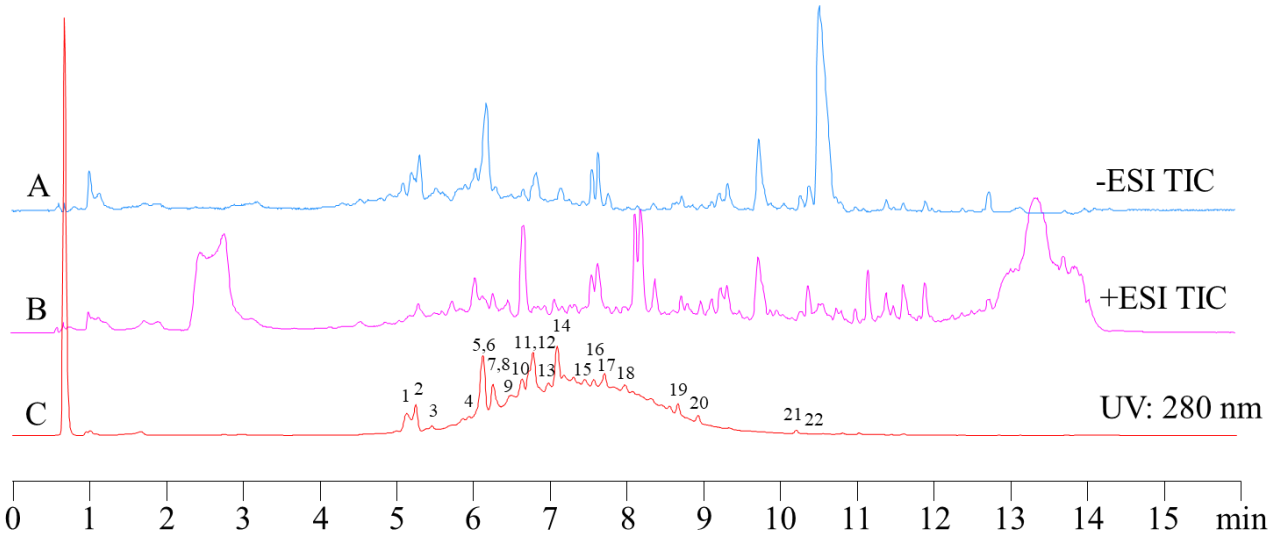

Supplementary Figure 2

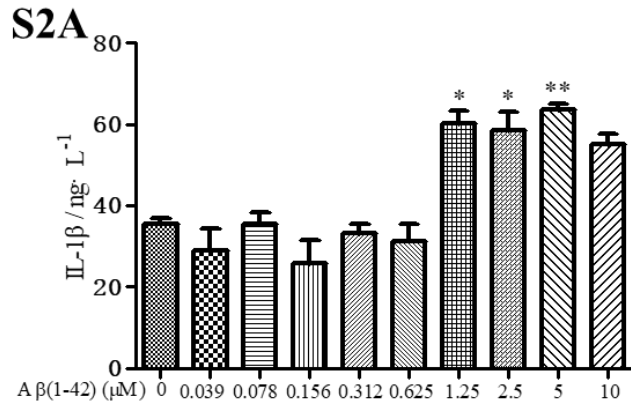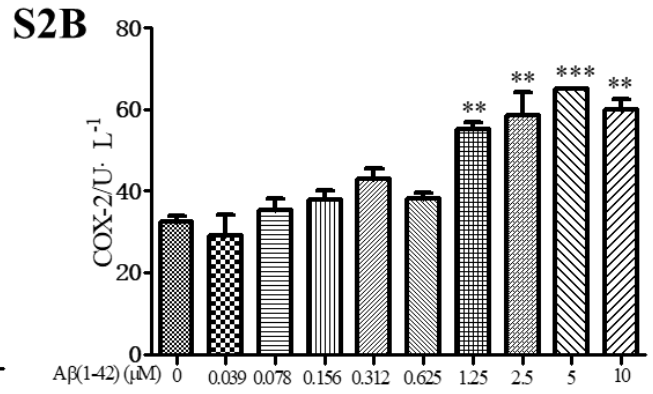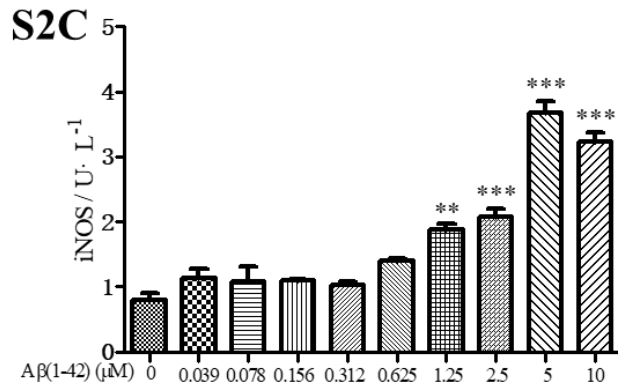

Supplementary Figure 3

S3A

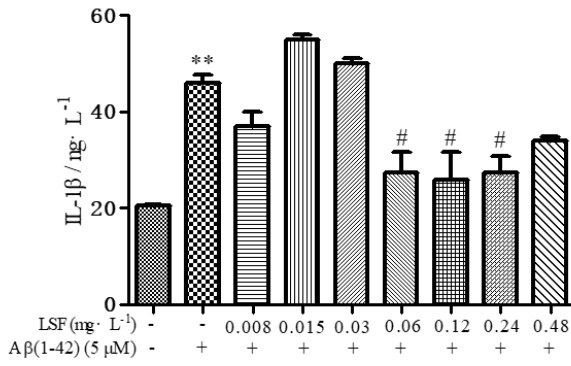

S3B

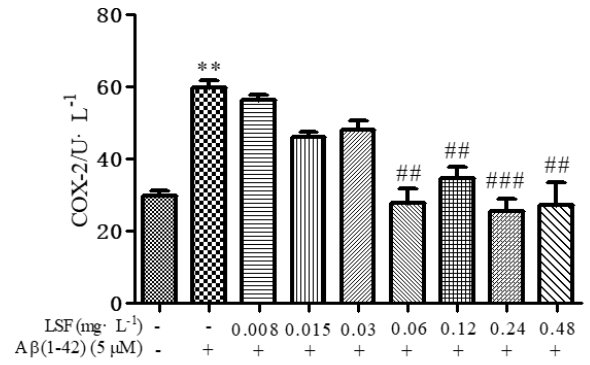

S3C

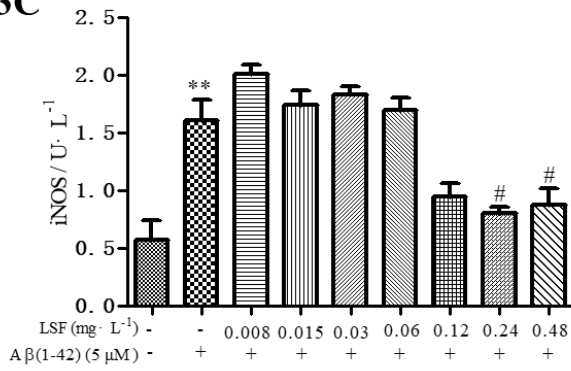

Supplementary Figure 4

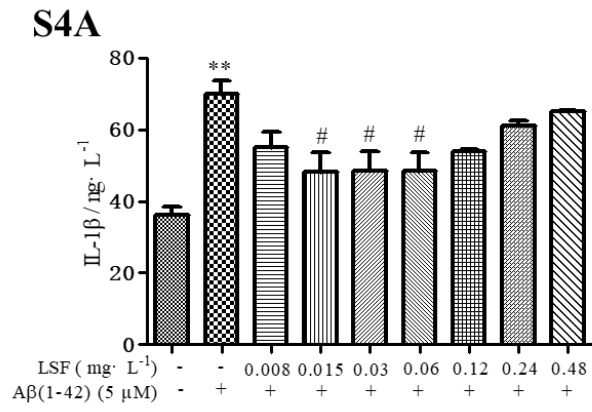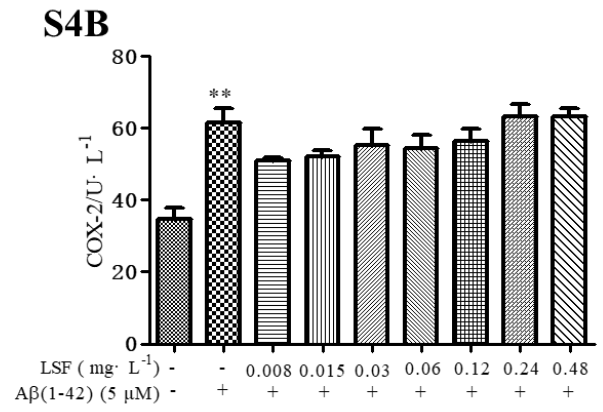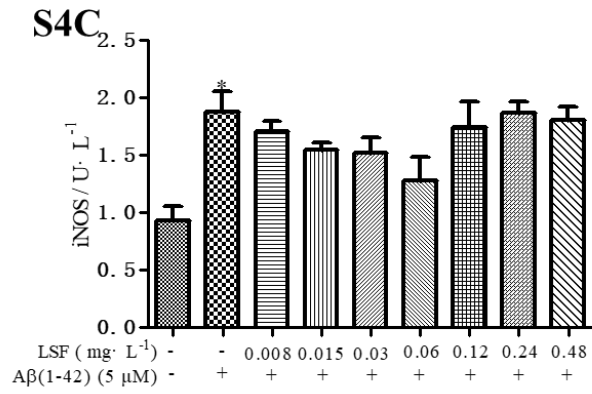

## Supplementary Figure 5

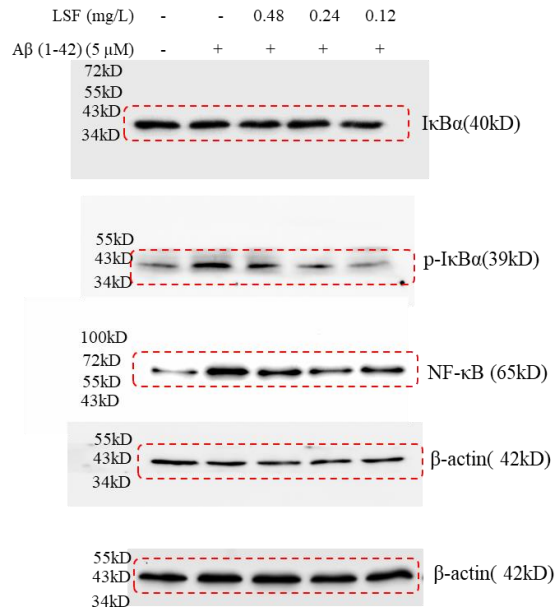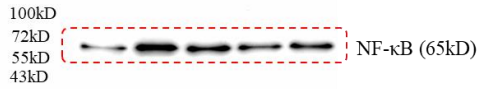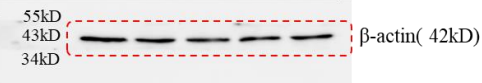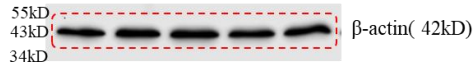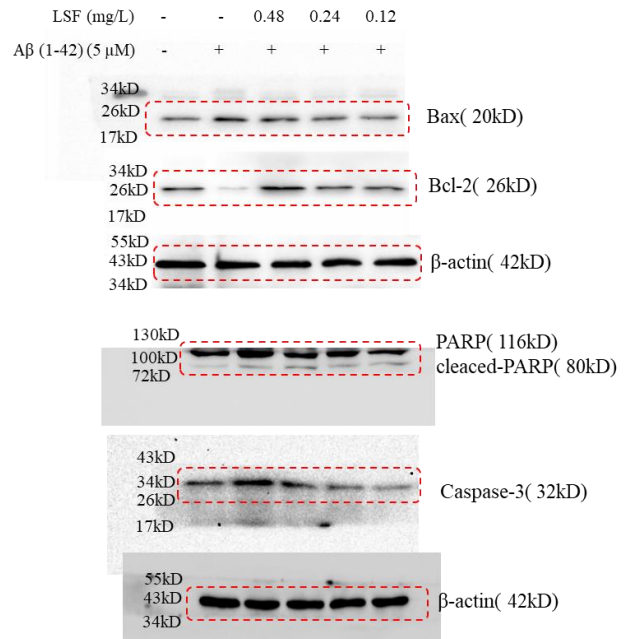

**Supplementary Table 1:** The characterization of the chemical components in LSF by using UHPLC-DAD-TOF-MS analysis in negative and positive mode

| Peak No. | Retention time (min) | [M-H] <sup>-</sup> (m/z) (Obs) | Positive mode       | (m/z) (Obs) | Molecular weight | Chemical name               |
|----------|----------------------|--------------------------------|---------------------|-------------|------------------|-----------------------------|
| 1        | 5.262                | 337.0798                       | [M+Na] <sup>+</sup> | 361.0936    | 338              | Hexahydroxydiphenic acid    |
| 2        | 5.347                | 337.0803                       | [M+Na] <sup>+</sup> | 361.0924    | 338              | Hexahydroxydiphenic acid    |
| 3        | 5.578                | 289.0723                       | [M+H] <sup>+</sup>  | 291.0891    | 290              | (-)-Catechin                |
| 4        | 5.968                | 577.1175                       | [M+H] <sup>+</sup>  | 579.1541    | 578              | B-type procyanidin trimer   |
| 5        | 6.084                | 387.1552                       | [M+Na] <sup>+</sup> | 411.1666    | 388              | Unidentified                |
| 6        | 6.167                | 289.0628                       | [M+H] <sup>+</sup>  | 291.0891    | 290              | (-)-Epicatechin             |
| 7        | 6.234                | 337.0841                       | [M+Na] <sup>+</sup> | 361.0926    | 338              | Hexahydroxydiphenic acid    |
| 8        | 6.328                | 863.1626                       | [M+H] <sup>+</sup>  | 865.2045    | 864              | A-type procyanidin trimer   |
| 9        | 6.535                | 479.1106                       | [M+H] <sup>+</sup>  | 481.2662    | 480              | Unidentified                |
| 10       | 6.718                | 863.1626                       | [M+H] <sup>+</sup>  | 865.0246    | 864              | A-type procyanidin trimer   |
| 11       | 6.85                 | 575.1061                       | [M+H] <sup>+</sup>  | 577.1397    | 576              | A-type procyanidin dimer    |
| 12       | 6.89                 | 609.1322                       | [M+Na] <sup>+</sup> | 633.1477    | 610              | Rutin                       |
| 13       | 7.134                | 463.0794                       | [M+Na] <sup>+</sup> | 487.2195    | 464              | Quercetin-3-O-β-D-glucoside |
| 14       | 7.214                | 575.1071                       | [M+H] <sup>+</sup>  | 577.1392    | 576              | A-type procyanidin dimer    |
| 15       | 7.624                | 419.1833                       | [M+Na] <sup>+</sup> | 443.1927    | 420              | Unidentified                |
| 16       | 7.712                | 405.2047                       | [M+Na] <sup>+</sup> | 429.2131    | 406              | Litchioside C               |
| 17       | 7.815                | 435.1204                       | [M+Na] <sup>+</sup> | 459.1294    | 436              | Phlorizin                   |
| 18       | 8.048                | 367.0619                       | [M+Na] <sup>+</sup> | 367.2116    | 368              | Unidentified                |
| 19       | 8.779                | 283.055                        | [M+Na] <sup>+</sup> | 307.0599    | 284              | Unidentified                |
| 20       | 9.05                 | 583.3368                       | [M+Na] <sup>+</sup> | 607.3498    | 584              | Litchioside A               |
| 21       | 10.105               | 865.3929                       | [M+H] <sup>+</sup>  | 867.378     | 866              | B-type procyanidin trimer   |
| 22       | 10.324               | 329.2328                       | [M+Na] <sup>+</sup> | 353.2308    | 330              | Unidentified                |
